# Supplementary material for: An Improved Method for Growing Primary Neurons on Electron Microscopy Grids Co-Cultured with Astrocytes
Source: MDPI journal article supplement (doi:10.3390/ijms242015191), 2023-10-14
Supplement: s1 [file s1]

## Supplementary Information

**Table S1.** Substance resources.

| <b>Substance</b>                               | <b>Supplier &amp; Order number</b> | <b>Comments</b>                |
|------------------------------------------------|------------------------------------|--------------------------------|
| <b>MEM-Non-Essential Amino Acids</b>           | Invitrogen 11140035                |                                |
| <b>DMEM</b>                                    | Invitrogen 31966047                |                                |
| <b>Penicillin/Streptomycin</b>                 | Invitrogen 15140122                |                                |
| <b>Fetal Bovine Serum (heat inactivated)</b>   | Invitrogen 10500064                | thaw, aliquot in 50 mL, freeze |
| <b>Trypsin, 2.5% (10x)</b>                     | Gibco 15090046                     |                                |
| <b>Trypsin Inhibitor (powder)</b>              | Sigma-Aldrich T-9253               |                                |
| <b>Bovine serum albumin (powder)</b>           | Sigma-Aldrich A9418 – 10 g         |                                |
| <b>0.05% Trypsin/EDTA</b>                      | Gibco 25300-054                    |                                |
| <b>HBSS</b>                                    | Invitrogen 24020133                |                                |
| <b>Neurobasal</b>                              | Invitrogen 21103049                |                                |
| <b>B27 – Supplement</b>                        | Invitrogen 17504044                |                                |
| <b>Glutamax-I Supplement</b>                   | Invitrogen 35050038                |                                |
| <b>HEPES (powder dissolved in miliQ water)</b> | Sigma-Aldrich H4034                | freeze 3.5 ml aliquots         |

**Video S1:** Tomographic reconstruction of a mature synapse (video corresponding to Figure 5D).

**Video S2:** Synaptic vesicle fusion and endocytosis in a mature synapse (video corresponding to Figure 5F).
